# Supplementary material for: Introducing an alternative oxidant for Spiro-OMeTAD with the reduction product to passivate perovskite defects
Source: Royal Society of Chemistry journal article supplement (doi:10.1039/d3tc01601c), 2023-01-01
Supplement: d3tc01601c1.pdf [file d3tc01601c1.pdf]

## Supporting Information

### Introducing an alternative oxidant for Spiro-OMeTAD with the reduction product to passivate perovskite defects

Xing Gao<sup>a</sup>, Fei Wu<sup>a,\*</sup>, Ye Zeng<sup>a</sup>, Kaixing Chen<sup>a</sup>, Xiaorui Liu<sup>b,\*</sup>, Linna Zhu<sup>a,\*</sup>

<sup>a</sup> *Chongqing Key Laboratory for Advanced Materials and Technologies of Clean Energy, School of Materials & Energy, Southwest University, Chongqing 400715, P. R. China.*

<sup>b</sup> *Key Laboratory of Luminescence Analysis and Molecular Sensing, Ministry of Education, School of Chemistry and Chemical Engineering, Southwest University, Chongqing 400715, P. R. China.*

**Corresponding Author:** *Linna Zhu, School of Materials & Energy, Southwest University, Chongqing, China, E-mail address: [lnzhu@swu.edu.cn](mailto:lnzhu@swu.edu.cn).*

*Fei Wu, School of Materials & Energy, Southwest University, Chongqing, China, E-mail address: [feiwu610@swu.edu.cn](mailto:feiwu610@swu.edu.cn).*

*Xiaorui Liu, School of Chemistry and Chemical Engineering, Southwest University, Chongqing, China, E-mail address: [liuxiaorui@swu.edu.cn](mailto:liuxiaorui@swu.edu.cn).*

#### Table of Contents

##### 1. Experimental Section

##### 2. Calculation formulas

### 3. Figures:

**Figure S1.** Photograph of different spiro-OMeTAD solutions undergoing thin-film chromatography.

**Figure S2.**  $^1\text{H}$  NMR spectrum of the reduction product of IBX.

**Figure S3.** XPS spectra of the I 3d of the perovskite film and perovskite/2-Iodobenzoic acid film.

**Figure S4.** XPS spectra of the I 3d of the 2-Iodobenzoic acid film.

**Figure S5.** XPS spectra of the C 1s of different films.

**Figure S6.** SEM images of spiro-OMeTAD films without (a) and with IBX (b).

**Figure S7.**  $J$ - $V$  curve of hole-only devices based on unoxidized Spiro-OMeTAD.

**Figure S8.** TRPL spectra of perovskite substrate with different HTL films.

**Figure S9.**  $J$ - $V$  curves of the devices based on spiro-OMeTAD with different concentrations of IBX.

**Figure S10.** Statistical distribution of photovoltaic parameters of the PSCs doped with or without IBX:  $J_{sc}$  (a),  $V_{oc}$  (b), FF (c) and PCE (d).

**Figure S11.** TPV of the PSCs with and without IBX.

### 4. Tables:

**Table S1.** Conductivity of spiro-OMeTAD films with different treatments.

**Table S2.** Specific values of series resistance ( $R_s$ ), and recombination resistance ( $R_{rec}$ ) of PSCs with and without IBX.

**Table S3.** Photovoltaic parameters of the devices with different concentrations of IBX.

**Table S4.** Photovoltaic data of the PSCs based on spiro-OMeTAD with and without IBX scanned from different directions.

## Experimental Section

### *Materials*

Spiro-OMeTAD, Li-TFSI, tBP, Cesium iodide (CsI, 99.90%), Formamidinium iodide (FAI, 99.90%), Lead iodide (PbI<sub>2</sub>, 99.99%) and Lead bromide (PbBr<sub>2</sub>, 99.99%) were purchased from Youxuan Tech.. N,N-Dimethylformamide (DMF, 99.80%), Dimethyl sulfoxide (DMSO, 99.80%), Chlorobenzene (CB, 99.80%) and Acetonitrile (ACN) were purchased from Sigma-aldrich. 30 NR-D transparent Titania paste was purchased from Xi'an Polymer Light Technology Corp. 2-Iodoxybenzoic acid (IBX, 97.00%) was purchased from Energy Chemical.

### *Solution preparation*

The perovskite precursor solution was prepared by dissolving 1.30 M PbI<sub>2</sub>, 1.19 M FAI, 0.14 M PbBr<sub>2</sub>, 0.14 M MABr, and 0.07 M CsI into the DMSO/DMF (1/4, v/v) mixture. The hole transport material solution was prepared by dissolving 72.5 mg of spiro-OMeTAD in 1mL of CB, with the additives of 28.5  $\mu$ L t-BP, 17.5  $\mu$ L Li-TFSI (520 mg mL<sup>-1</sup> in ACN). For the spiro-OMeTAD solution with IBX, IBX was added into HTL precursor solution, the concentration of IBX were 1.0 mg mL<sup>-1</sup>, 1.5 mg mL<sup>-1</sup>, 2.0 mg mL<sup>-1</sup>, 2.5 mg mL<sup>-1</sup>, and 3.0 mg mL<sup>-1</sup>, respectively.

### *Fabrication of perovskite solar cells*

The FTO glass substrates (14  $\Omega$  per square) were ultrasonically cleaned with detergent, deionized water and ethanol for 20 min in sequence, and dried by nitrogen flow. Then the dry FTO substrates were treated by O<sub>2</sub>-plasma for 180 s before using.

After that, a compact TiO<sub>2</sub> layer was deposited on the cleaned FTO glass by spray pyrolysis from a precursor solution of 0.2 M titanium isopropoxide and 2 M acetylacetone in isopropanol. The mesoporous TiO<sub>2</sub> was prepared by diluting a commercial TiO<sub>2</sub> paste (30 NR-D) with anhydrous ethanol at a weight ratio of 1/6. After sintering the compact TiO<sub>2</sub>, the mesoporous TiO<sub>2</sub> layer was spin-coated onto the TiO<sub>2</sub> compact layer at 5000 rpm for 30 s, and sintered. The perovskite film was deposited by a consecutive two-step spin-coating process at 2000 rpm for 10 s and then at a speed of 6000 rpm for 30 s on the surface of mesoporous TiO<sub>2</sub> layer. At the time of 15 s prior to the program end, 100 μL of chlorobenzene was dripped on the spinning substrate, and then the film was annealed at 120 °C for 1 h. The spiro-OMeTAD solution (with or without IBX) was spin-coated on the perovskite film at 6000 rpm for 30 s. Finally, 60 nm thick Au film was thermally evaporated on the HTL in vacuum environment ( $<10^{-5}$ Pa) to accomplish the whole fabrication of device.

### *Characterizations*

UV-vis absorption spectra were measured on a Shimadzu UV-2550 absorption spectrophotometer. Fluorescence emission spectra was measured by fluorescence spectrophotometer (RF-5301PC). The space-charge limited current (SCLC) measurements were performed by collecting the  $J$ - $V$  characteristics of devices in dark conditions. The Fourier-transform infrared spectroscopy (FTIR) spectroscopy was carried out using Thermo Nicolet 6700. The current-voltage ( $J$ - $V$ ) characteristics were measured under 100 mW cm<sup>-2</sup> (AM 1.5G illumination) using a Newport solar simulator (model 91160) and a Keithley 2400 source/meter. PL and TR-PL spectra

were obtained via using the Pico Quant Fluotime 300 with a 510 nm picosecond pulsed laser. The surface morphology of films was characterized by FE-SEM images (JSM-7800F), and atomic force microscope (AFM) was used for characterizing the morphology using a CSPM5500. X-ray photoelectron spectroscopy (XPS) was performed using a scanning XPS microprobe (K-Alpha). The EIS were measured with CHI 6500 in the dark. Film thickness were measured with Surfcoorder ET150. Transient photocurrent (TPC) and transient photovoltage (TPV) were recorded using a ZAHNE<sup>®</sup>MESSSYSTEME (Instrument model: PP211).

### **Hole Mobility Measurements**

Devices structure: FTO/PEDOT:PSS/Spiro-OMeTAD with or without IBX/MoO<sub>3</sub>/Ag

The hole mobilities ( $\mu$ ) were measured by using space charge limited current (SCLC) method with an equation as follows:

$$J = \frac{9\varepsilon_0\varepsilon_r\mu V^2}{8L^3}$$

where  $\varepsilon_0$  and  $\varepsilon_r$  are the vacuum permittivity ( $8.85 \times 10^{-12}$  F/m) and relative permittivity, respectively.  $J$  is the current density,  $\mu$  is the hole mobility,  $V$  is voltage, and  $L$  is the film thickness.

### **Conductivity Measurements**

Devices structure: FTO/Spiro-OMeTAD with or without IBX/Ag

The conductivity of spiro-OMeTAD films with or without IBX is characterized by  $J$ - $V$  curves. The conductivity was calculated according to the following equation:

$$\sigma = Id/AV$$

where  $A$  is the active area of the device,  $d$  is the thickness of the films,  $I$  is the current, and  $V$  is the voltage.

## TRPL Analysis

The TRPL results are fitted through the biexponential equation as below:

$$f(t) = A_1 \exp\left(\frac{-t}{\tau_1}\right) + A_2 \exp\left(\frac{-t}{\tau_2}\right)$$

And the average value of lifetime ( $\tau_{ave.}$ ) is calculated by the following equation:

$$\tau_{ave.} = \frac{A_1 * \tau_1^2 + A_2 * \tau_2^2}{A_1 * \tau_1 + A_2 * \tau_2}$$

$\tau_1$  and  $\tau_2$  represent the fast and slow decay times, which are derived from the charge carriers quenching and the radiative recombination, respectively.

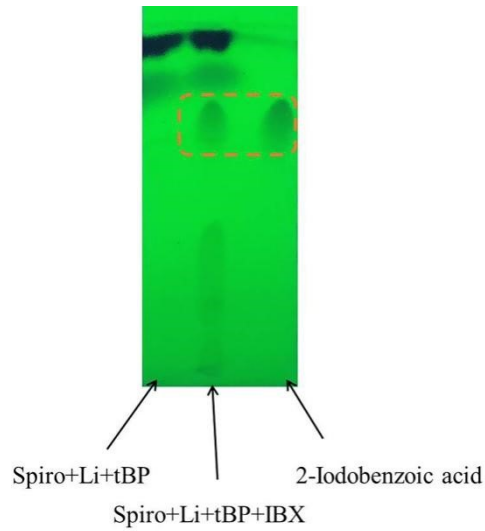

**Figure S1.** Photograph of different spiro-OMeTAD solutions undergoing thin-film chromatography.

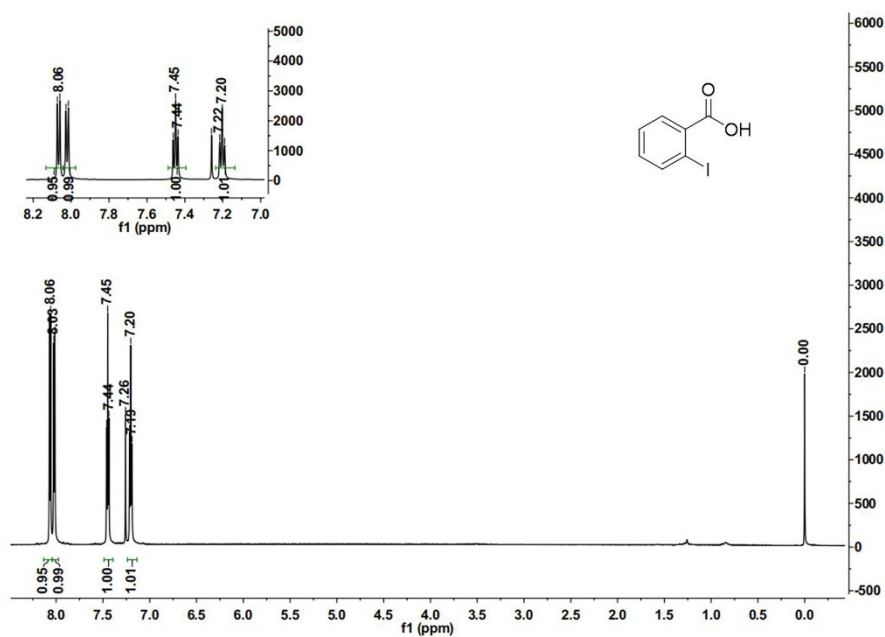

**Figure S2.**  $^1\text{H}$  NMR spectrum of the reduction product of IBX.

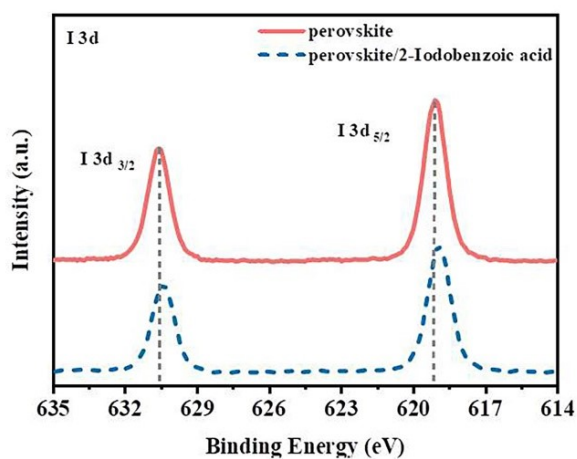

**Figure S3.** XPS spectra of the I 3d of the perovskite film and perovskite/2-Iodobenzoic acid film.

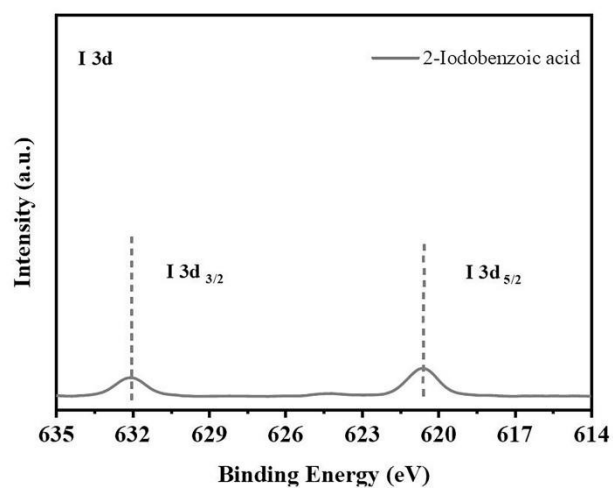

**Figure S4.** XPS spectra of the I 3d of the 2-Iodobenzoic acid film.

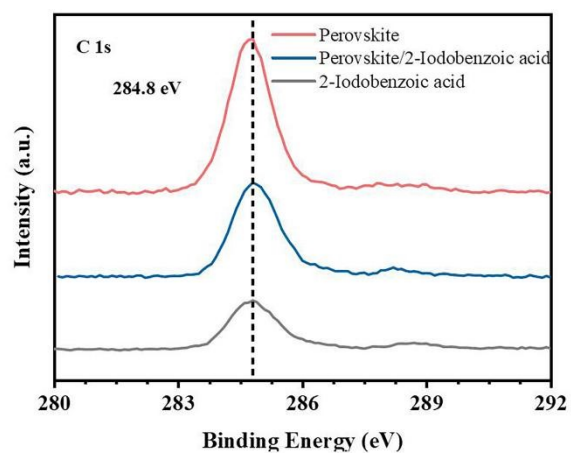

**Figure S5.** XPS spectra of the C 1s of different films.

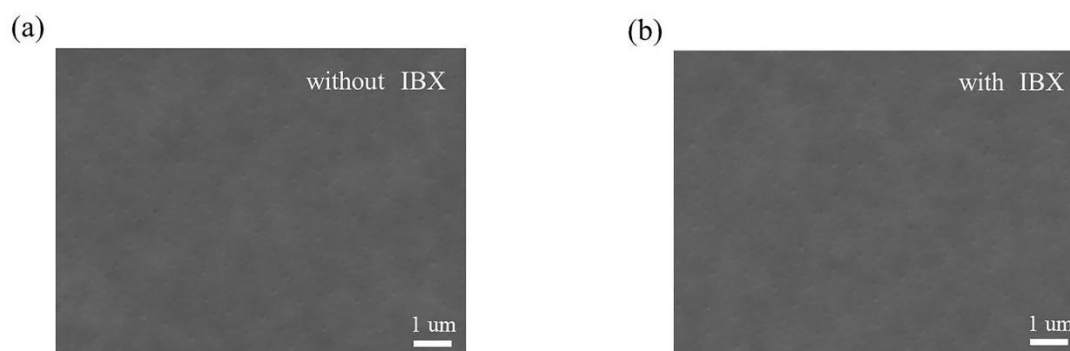

**Figure S6.** SEM images of spiro-OMeTAD films without (a) and with IBX (b).



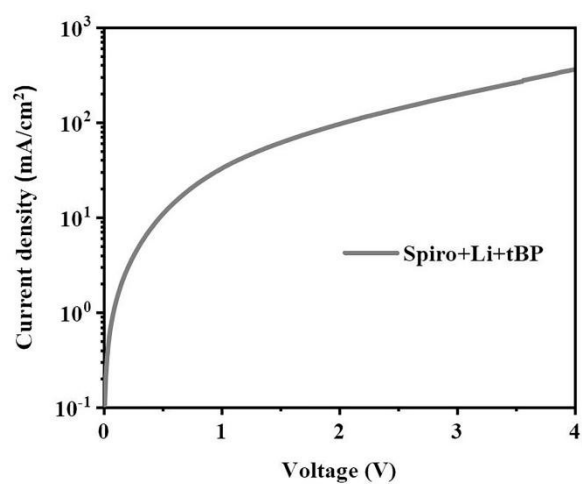

**Figure S7.** J-V curve of hole-only devices based on unoxidized Spiro-OMeTAD.

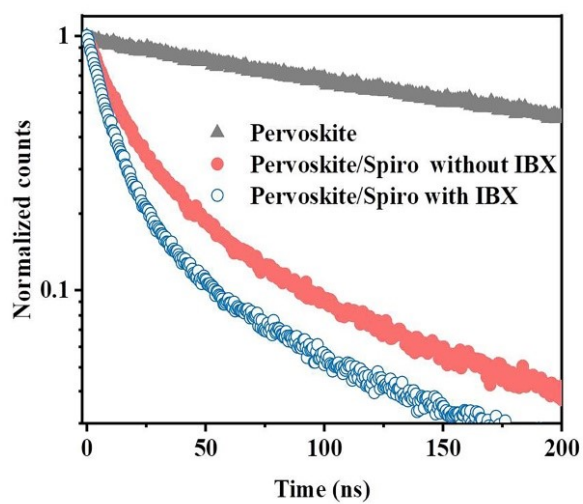

**Figure S8.** TRPL spectra of perovskite substrate with different HTL films.

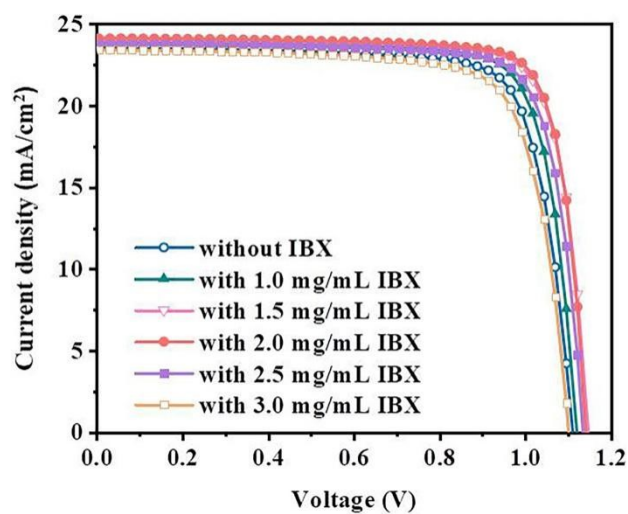

**Figure S9.**  $J$ - $V$  curves of the devices based on spiro-OMeTAD with different concentrations of IBX.

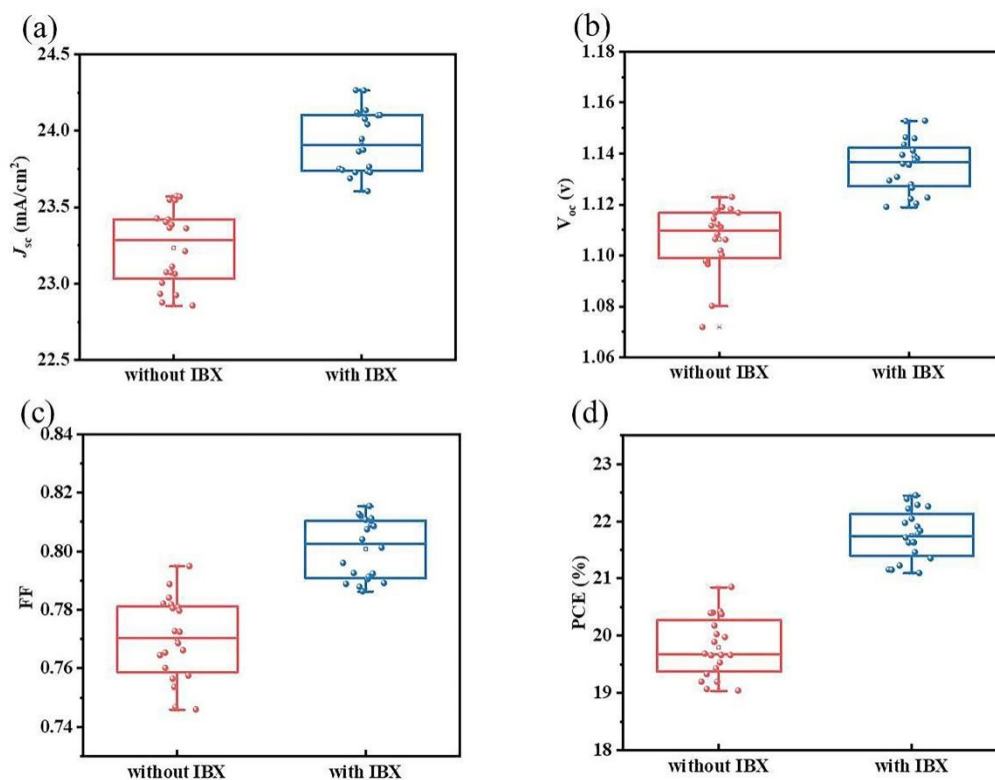

**Figure S10.** Statistical distribution of photovoltaic parameters of the PSCs doped with or without IBX:  $J_{sc}$  (a),  $V_{oc}$  (b), FF (c) and PCE (d).

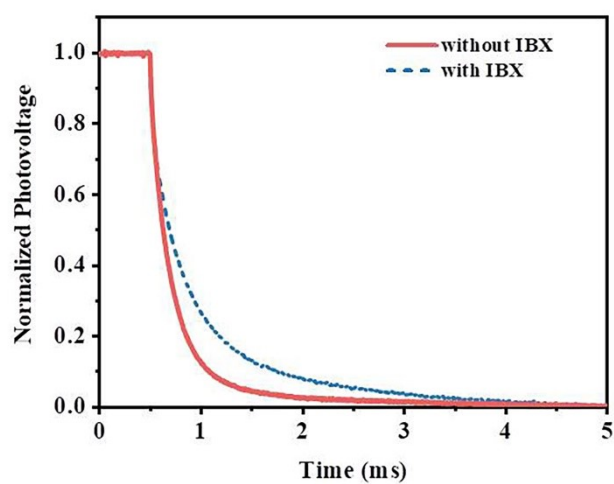

**Figure S11.** TPV of the PSCs with and without IBX.

**Table S1.** Conductivity of spiro-OMeTAD films with different treatments.

| Sample                      | $\text{S}\cdot\text{cm}^{-1}$ |
|-----------------------------|-------------------------------|
| spiro+Li+tBP                | $3.8 \times 10^{-5}$          |
| spiro+Li+tBP+O <sub>2</sub> | $8.7 \times 10^{-5}$          |
| spiro+Li+tBP+IBX            | $1.5 \times 10^{-4}$          |

**Table S2.** Specific values of series resistance ( $R_s$ ), and recombination resistance ( $R_{\text{rec}}$ ) of PSCs with and without IBX.

| Devices     | $R_s$ ( $\Omega$ ) | $R_{\text{rec}}$ ( $\Omega$ ) |
|-------------|--------------------|-------------------------------|
| without IBX | 23                 | 2135                          |
| with IBX    | 20                 | 4180                          |

**Table S3.** Photovoltaic parameters of the devices with different concentrations of IBX.

| Doping concentration<br>(mg/mL) | $J_{sc}$ (mA/cm <sup>2</sup> ) | $V_{oc}$ (V) | FF   | PCE (%) |
|---------------------------------|--------------------------------|--------------|------|---------|
| 0.0                             | 23.54                          | 1.11         | 0.78 | 20.42   |
| 1.0                             | 23.88                          | 1.12         | 0.79 | 21.25   |
| 1.5                             | 24.01                          | 1.14         | 0.81 | 22.22   |
| 2.0                             | 24.13                          | 1.14         | 0.82 | 22.45   |
| 2.5                             | 23.80                          | 1.13         | 0.80 | 21.55   |
| 3.0                             | 23.42                          | 1.10         | 0.76 | 19.70   |

**Table S4.** Photovoltaic data of the PSCs based on spiro-OMeTAD with and without IBX scanned from different directions.

| Doping      | Scan direction | $J_{sc}$<br>(mA/cm <sup>2</sup> ) | $V_{oc}$ (V) | FF   | PCE (%) |
|-------------|----------------|-----------------------------------|--------------|------|---------|
| Without IBX | Forward        | 23.54                             | 1.11         | 0.78 | 20.42   |
|             | Reverse        | 23.49                             | 1.10         | 0.75 | 19.29   |
| With IBX    | Forward        | 24.13                             | 1.14         | 0.82 | 22.45   |
|             | Reverse        | 24.11                             | 1.13         | 0.79 | 21.66   |
